# Supplementary material for: Antiplatelet and Antithrombotic Effects of Isaridin E Isolated from the Marine-Derived Fungus via Downregulating the PI3K/Akt Signaling Pathway
Source: MDPI journal article supplement (doi:10.3390/md20010023), 2021-12-24
Supplement: s1 [file s1]

## Supporting Information

### Antiplatelet and antithrombotic effects of isaridin E isolated from the marine-derived fungus via down-regulating PI3K/Akt signaling pathway

Ni Pan<sup>1,2</sup>, Zi-Cheng Li<sup>1</sup>, Zhi-Hong Li<sup>1</sup>, Sen-Hua Chen<sup>3</sup>, Ming-Hua Jiang<sup>3</sup>, Han-Yan Yang<sup>1</sup>, Yao-Sheng Liu<sup>1</sup>, Rui Hu<sup>1</sup>, Yu-Wei Zeng<sup>1</sup>, Le-Hui Dai<sup>4</sup>, Lan Liu<sup>3,\*</sup>, and Guan-lei Wang<sup>1,\*</sup>

<sup>1</sup> Department of Pharmacology, Zhongshan School of Medicine, Sun Yat-sen University, Guangzhou, 510080, China.

<sup>2</sup> Institute of Pediatrics, Guangzhou Women and Children's Medical Centre, Guangzhou Medical University, Guangzhou, 510080, China.

<sup>3</sup> School of Marine Sciences, Sun Yat-sen University, Guangzhou 510006, China.

<sup>4</sup> Department of Basic Medical Sciences, Zhongshan School of Medicine, Sun Yat-sen University, Guangzhou, 510080, China.

\* Correspondence: [wanglei@mail.sysu.edu.cn](mailto:wanglei@mail.sysu.edu.cn) (W.G.L.); [cesllan@mail.sysu.edu.cn](mailto:cesllan@mail.sysu.edu.cn) (L.L). Tel. : +86-20-87330300.

## Contents

|                                                                                               |   |
|-----------------------------------------------------------------------------------------------|---|
| Figure S1. The HR-ESIMS spectrum of compound 1. ....                                          | 2 |
| Figure S2. The <sup>1</sup> H NMR (400MHz) spectrum of compound 1 in CDCl <sub>3</sub> .....  | 2 |
| Figure S3. The <sup>13</sup> C NMR (100MHz) spectrum of compound 1 in CDCl <sub>3</sub> ..... | 3 |
| Table S1. Effects of isaridin E on the hematologic parameters. ....                           | 3 |
| Table S2. Effects of isaridin E on the coagulation parameters. ....                           | 4 |

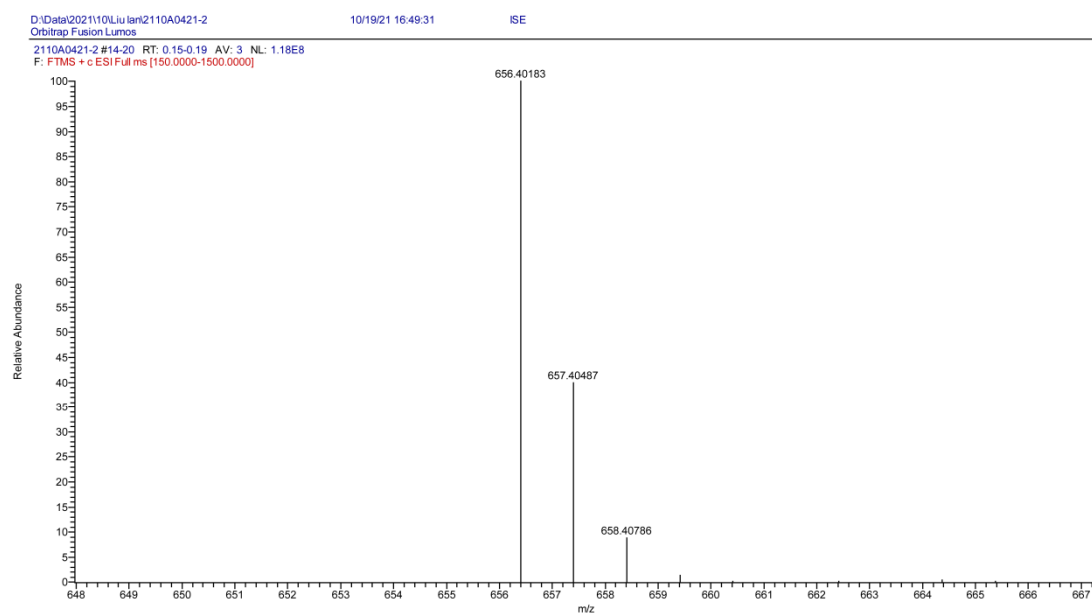

| SPECTRUM - simulation |            |             |            |                                                               |
|-----------------------|------------|-------------|------------|---------------------------------------------------------------|
| m/z                   | Theo. Mass | Delta (ppm) | RDB equiv. | Composition                                                   |
| 656.40183             | 656.40178  | 0.08        | 11.5       | C <sub>35</sub> H <sub>54</sub> O <sub>7</sub> N <sub>5</sub> |

Figure S1. The HR-ESIMS spectrum of compound 1 (isaridin E).

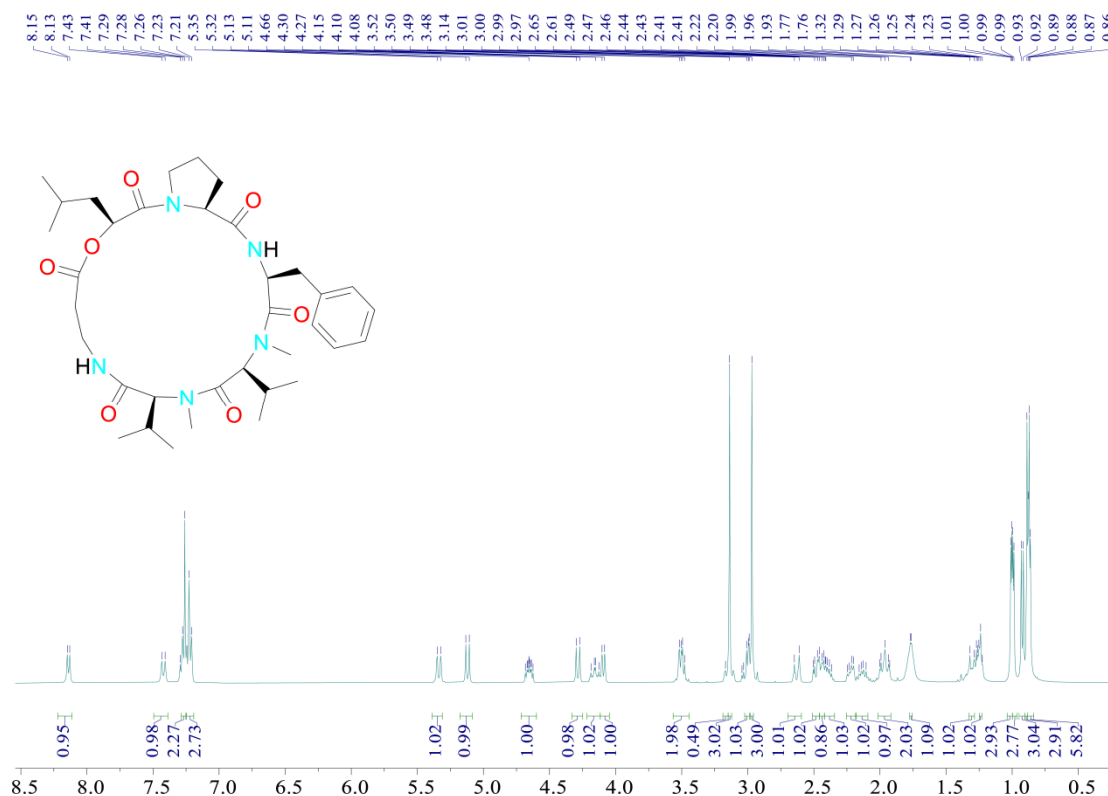Figure S2. The <sup>1</sup>H NMR (400MHz) spectrum of compound 1 (isaridin E) in CDCl<sub>3</sub>.

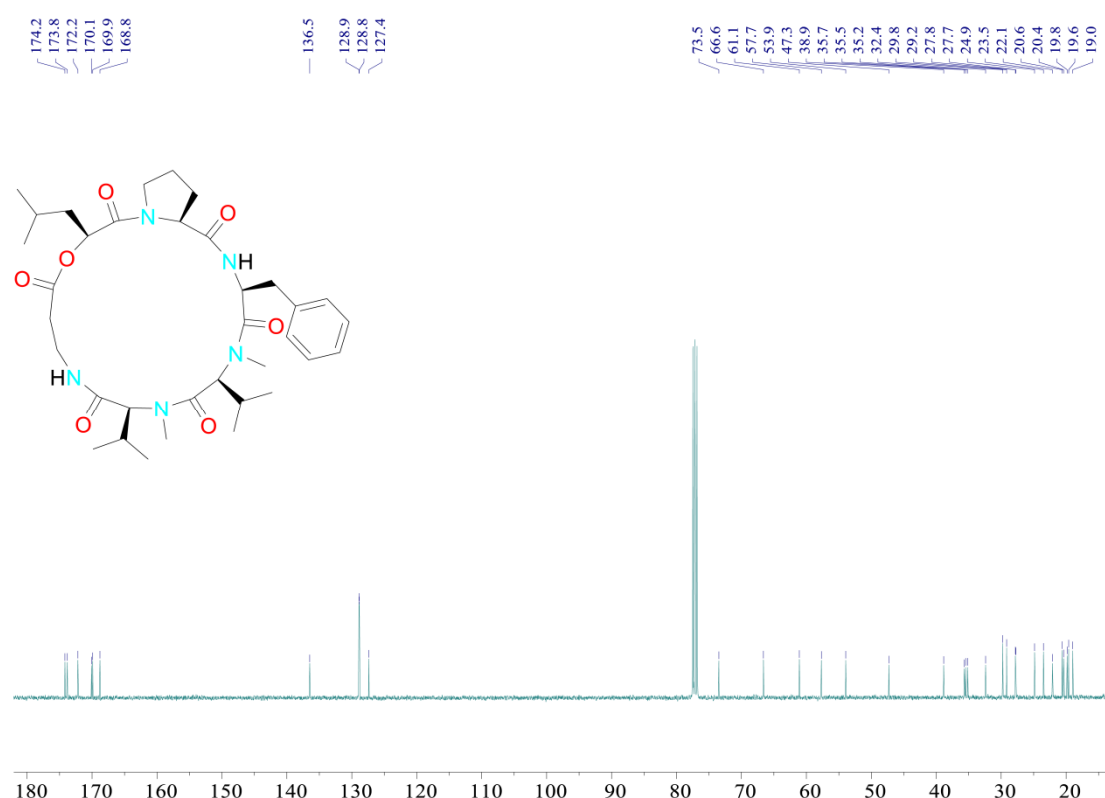

Figure S3. The  $^{13}\text{C}$  NMR (100MHz) spectrum of compound 1 (isaridin E) in  $\text{CDCl}_3$ .

Table S1. Effects of isaridin E on the hematologic parameters.

|                            | NS             | Vehicle        | Isaridin E     | $P^1$ value | $P^2$ value |
|----------------------------|----------------|----------------|----------------|-------------|-------------|
| PLT ( $10^9/\text{L}$ )    | $1303 \pm 114$ | $1267 \pm 77$  | $1233 \pm 65$  | 0.8010      | 0.6100      |
| MPV (fL)                   | $5.1 \pm 0.3$  | $4.9 \pm 0.3$  | $5.3 \pm 0.3$  | 0.6763      | 0.7896      |
| WBC ( $10^9/\text{L}$ )    | $3.3 \pm 0.6$  | $2.8 \pm 0.4$  | $3.3 \pm 0.5$  | 0.4372      | 0.9799      |
| LY % (%)                   | $84.2 \pm 2.2$ | $82.3 \pm 3.0$ | $83.1 \pm 2.5$ | 0.6325      | 0.7407      |
| MO % (%)                   | $2.9 \pm 0.7$  | $3.4 \pm 0.7$  | $2.7 \pm 0.6$  | 0.6400      | 0.8544      |
| NE % (%)                   | $13.1 \pm 2.1$ | $14.2 \pm 2.0$ | $14.8 \pm 2.2$ | 0.7200      | 0.5984      |
| RBC ( $10^{12}/\text{L}$ ) | $8.0 \pm 0.4$  | $7.6 \pm 0.6$  | $7.8 \pm 0.3$  | 0.5521      | 0.6919      |
| HCT (%)                    | $39.2 \pm 0.8$ | $38.3 \pm 1.2$ | $39.5 \pm 1.4$ | 0.5518      | 0.8662      |
| MCV (fL)                   | $51.4 \pm 0.7$ | $52.1 \pm 0.6$ | $51.1 \pm 0.8$ | 0.4805      | 0.7655      |
| MCH (pg)                   | $17.1 \pm 0.5$ | $17.5 \pm 0.6$ | $17.3 \pm 0.4$ | 0.6161      | 0.7695      |
| MCHC (g/L)                 | $328 \pm 8$    | $325.8 \pm 5$  | $330 \pm 8$    | 0.8287      | 0.8616      |
| RDW (%)                    | $15.6 \pm 0.4$ | $15.9 \pm 0.5$ | $15.2 \pm 0.5$ | 0.6035      | 0.5828      |

Note: Mice were given a single dose of normal saline (NS), vehicle solution (Vehicle) or isaridin E (100 mg/kg) respectively by gavage for 3 h, and then the hematologic parameters were measured.  $P^1$ , NS vs Vehicle;  $P^2$ , NS vs isaridin E,  $n=5$  mice for each group. PLT, platelet count; MPV, mean platelet volume; WBC, white blood cell; LY %, lymphocyte percentage; MO %, monocyte percentage; NE %, neutrophil percentage; RBC, red blood cell; HCT, hematocrit; MCV, mean red blood cell volume; MCH, mean red blood cell hemoglobin; MCHC, mean red blood cell hemoglobin concentration; RDW, red cell distribution width.

**Table S2.** Effects of isaridin E on the coagulation parameters.

|                             | ATPP (s)   | PT (s)     | TT (s)     | FIB (g/L) |
|-----------------------------|------------|------------|------------|-----------|
| NS                          | 30.5 ± 1.5 | 12.5 ± 0.4 | 14.6 ± 0.5 | 3.2 ± 0.1 |
| Vehicle                     | 31.3 ± 1.1 | 11.8 ± 0.3 | 15.0 ± 0.6 | 3.3 ± 0.2 |
| Isaridin E                  | 32.4 ± 1.0 | 12.1 ± 0.4 | 14.0 ± 0.8 | 3.1 ± 0.1 |
| <i>P</i> <sup>1</sup> value | 0.6496     | 0.2415     | 0.5909     | 0.7135    |
| <i>P</i> <sup>2</sup> value | 0.2924     | 0.5349     | 0.5425     | 0.4417    |

Note: 3 h after mice were administrated with a single dose of saline (NS), vehicle solution (Vehicle) or isaridin E (100 mg/kg) by oral gavage, coagulation parameters were analyzed. *P*<sup>1</sup>, NS *vs* Vehicle; *P*<sup>2</sup>, NS *vs* isaridin E, n = 5 mice/group. APTT, activated partial thromboplastin time; TT, thrombin time; FIB, fibrinogen; PT, prothrombin time.
